# Supplementary figures and images for: Mapping the 5-HTergic neural pathways in perimenopausal mice and elucidating the role of oestrogen receptors in 5-HT neurotransmission
Source: PubMed Central journal article supplement — Heliyon. 2024 Mar 11;10(6):e27976. doi: 10.1016/j.heliyon.2024.e27976 (PMC10951590; doi:10.1016/j.heliyon.2024.e27976), 2024-03-11

Fig.12D-ER

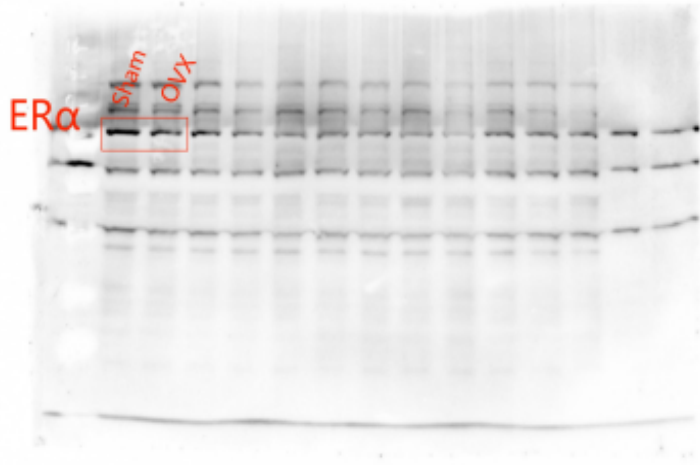

Fig.12D-GAPDH

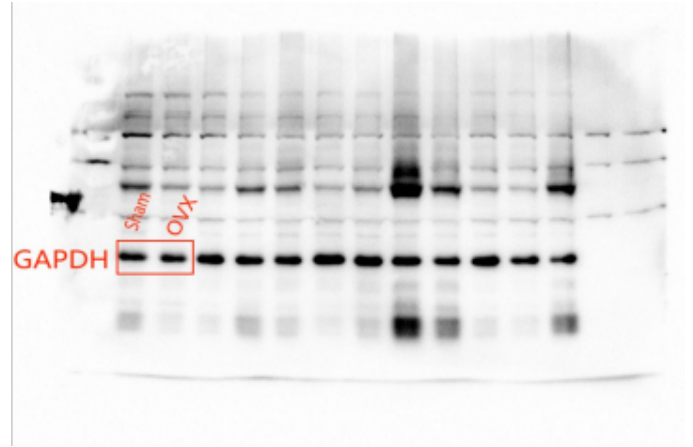

Fig.12E-ER

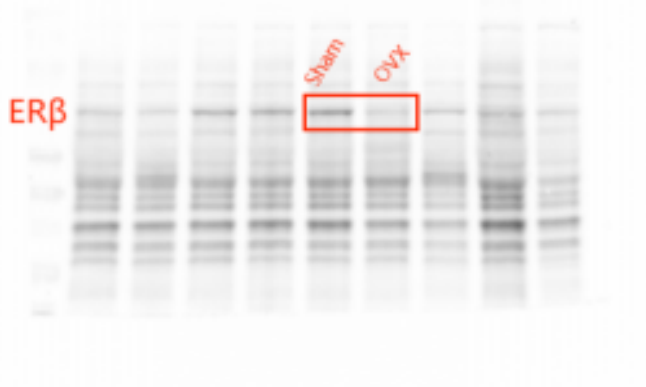

Fig.12E-GAPDH

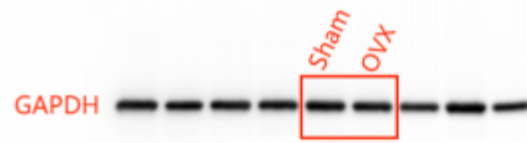

Fig.12F-GPR30

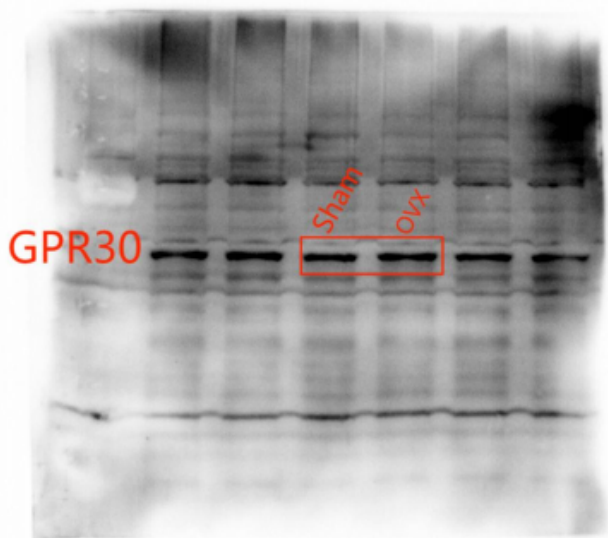

Fig.12F-GAPDH

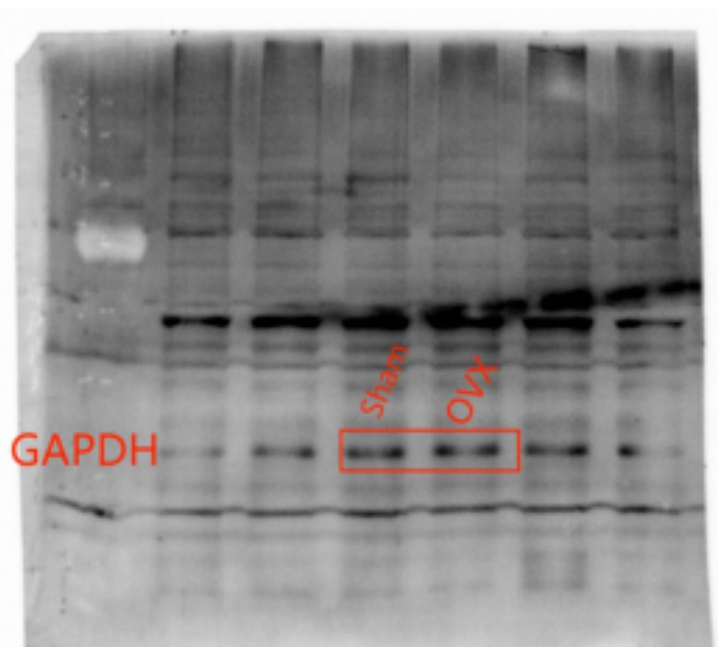

Supplement: mmc1.pdf [file mmc1.pdf]

Fig.16E-TPH2

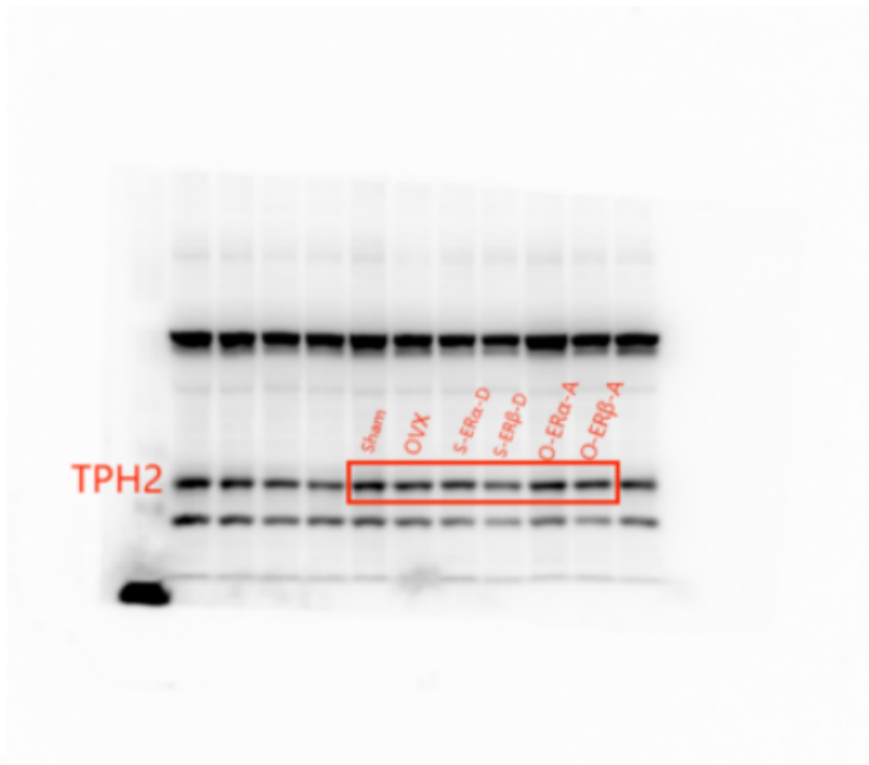

Fig.16E-MAOA

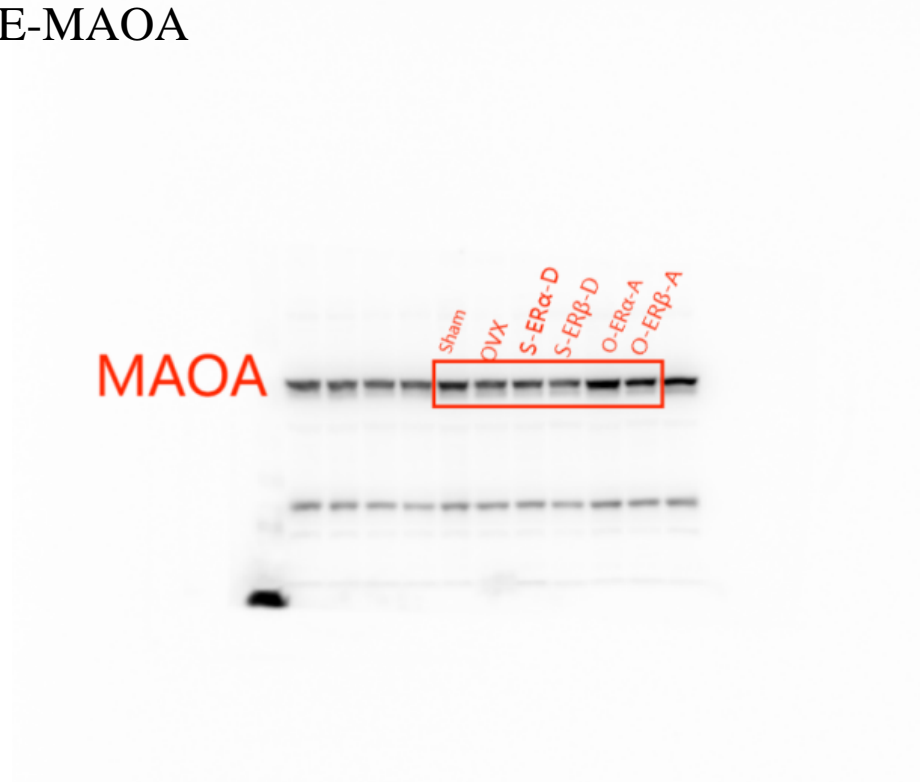

Fig.16E-GAPDH

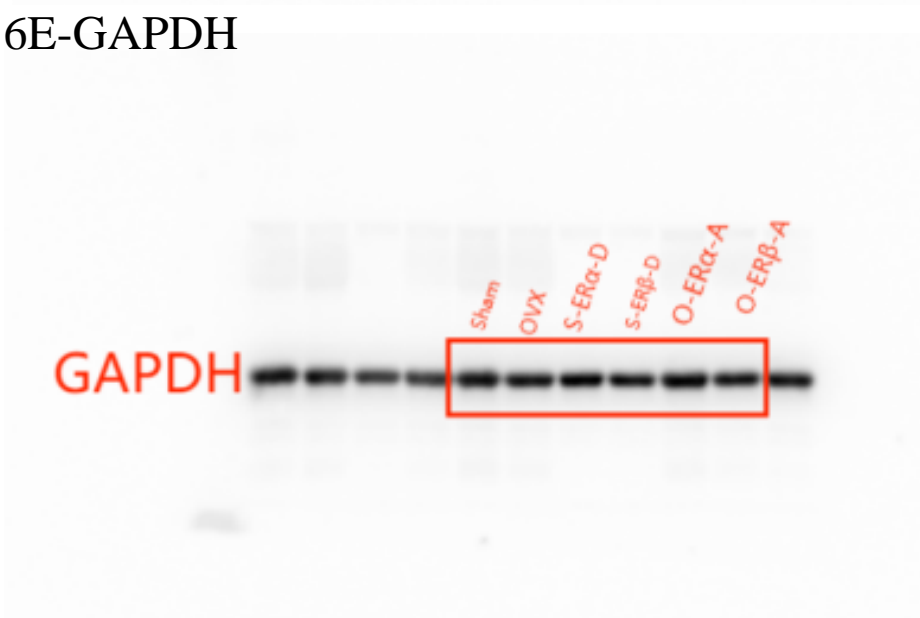

Supplement: mmc2.pdf [file mmc2.pdf]
